# Supplementary material
Source: Springer Nature journal article supplement (https://www.springermedizin.de/resource/supplementary/12880_2013_221_MOESM4_ESM.pdf/9450262)

short gastric artery

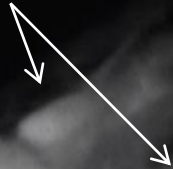

gastric wall vessels

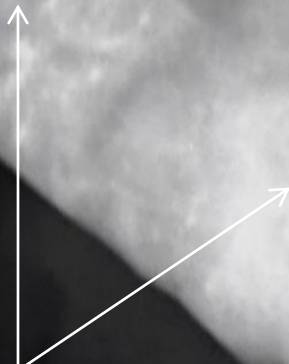

splenic hiatal vessels

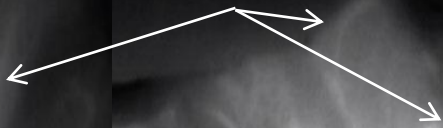

left gastroepiploic artery

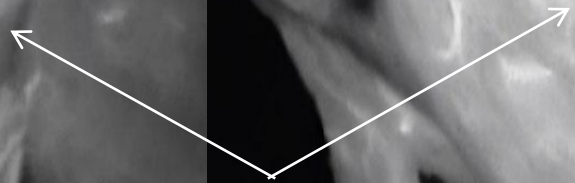

short gastric artery

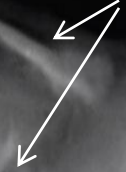

gastric wall vessels

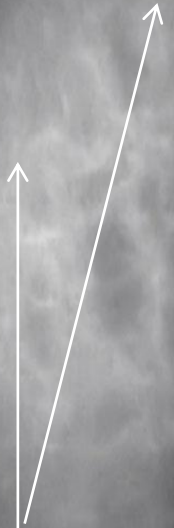

Supplement: MOESM4 [file 9450262]
